# Supplementary material for: Study on the catalytic activity and hydrothermal stability of one-pot synthesized Fe-based FER zeolites for NH3-SCR
Source: Royal Society of Chemistry journal article supplement (doi:10.1039/d3cy00761h), 2023-01-01
Supplement: d3cy00761h1.pdf [file d3cy00761h1.pdf]

## Supplementary Information

### Study on the catalytic activity and hydrothermal stability of one-pot synthesized Fe-based FER zeolites for NH<sub>3</sub>-SCR

Xinyue Hu<sup>a</sup>, Jialing Chen<sup>\*a</sup>, Shaokang He<sup>a</sup>, Tingyu Liang<sup>\*b</sup>, Shenke Zheng<sup>\*c</sup>, Lijun Lu<sup>d</sup>, Chenxi Hao<sup>a</sup>, Kaixin Chen<sup>a</sup>, Tingting Li<sup>a</sup>, Lan Yi<sup>a</sup>, Li Guo<sup>a</sup>, Xiaoqin Wu<sup>a</sup>

<sup>a</sup> Key Laboratory of Hubei Province for Coal Conversion and New Carbon Materials, School of Chemistry and Chemical Engineering, Wuhan University of Science and Technology, Wuhan, 430081, China

<sup>b</sup> Key Laboratory for Green Chemical Process of Ministry of Education, and Hubei Key Laboratory of Novel Reactor & Green Chemical Technology, School of Chemical Engineering & Pharmacy, Wuhan Institute of Technology, Wuhan 430205, China

<sup>c</sup> Hubei Key Laboratory for Processing and Application of Catalytic Materials, School of Chemistry and Chemical Engineering, Huanggang Normal University, Huanggang, 438000, China

<sup>d</sup> R&D Center of Wuhan Iron&Steel Co., LTD., Baosteel Central Research Institute

† Corresponding authors: Tel.: +86 027 68862335. E-mail addresses: chenjialing@wust.edu.cn; litingyu2006@126.com; zhengshenke@hgnu.edu.cn.

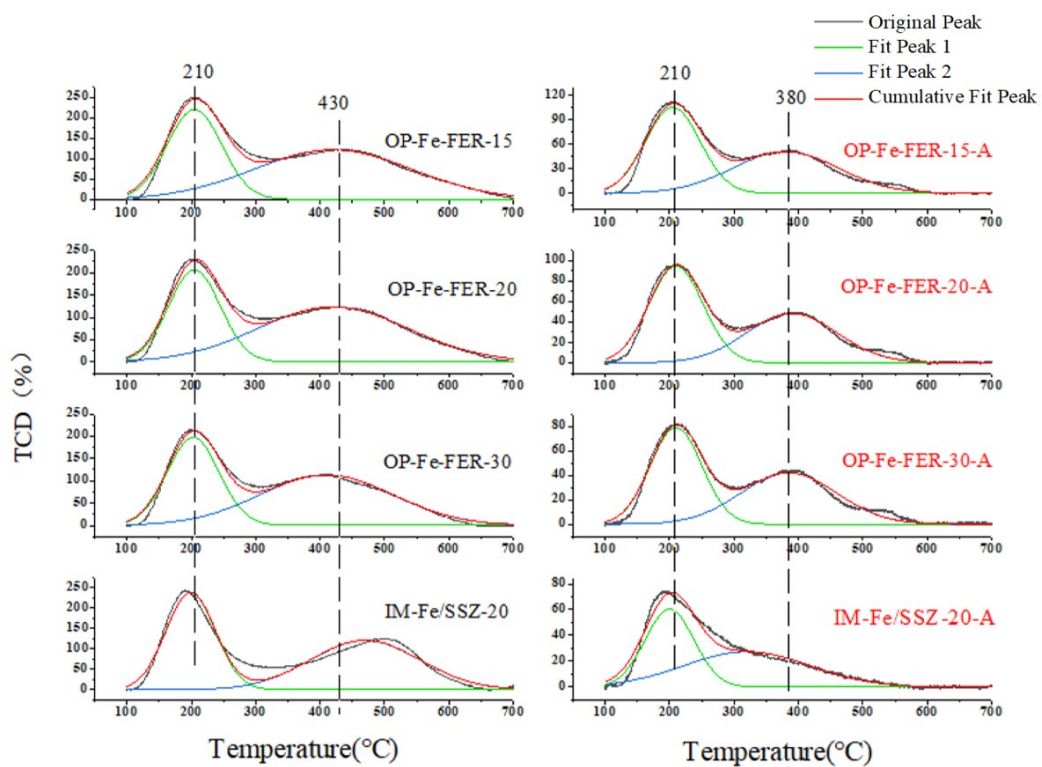

Figure S1 NH<sub>3</sub>-TPD fitting results of fresh and aged OP-Fe-FER-x and IM-Fe/SSZ-20 zeolites.

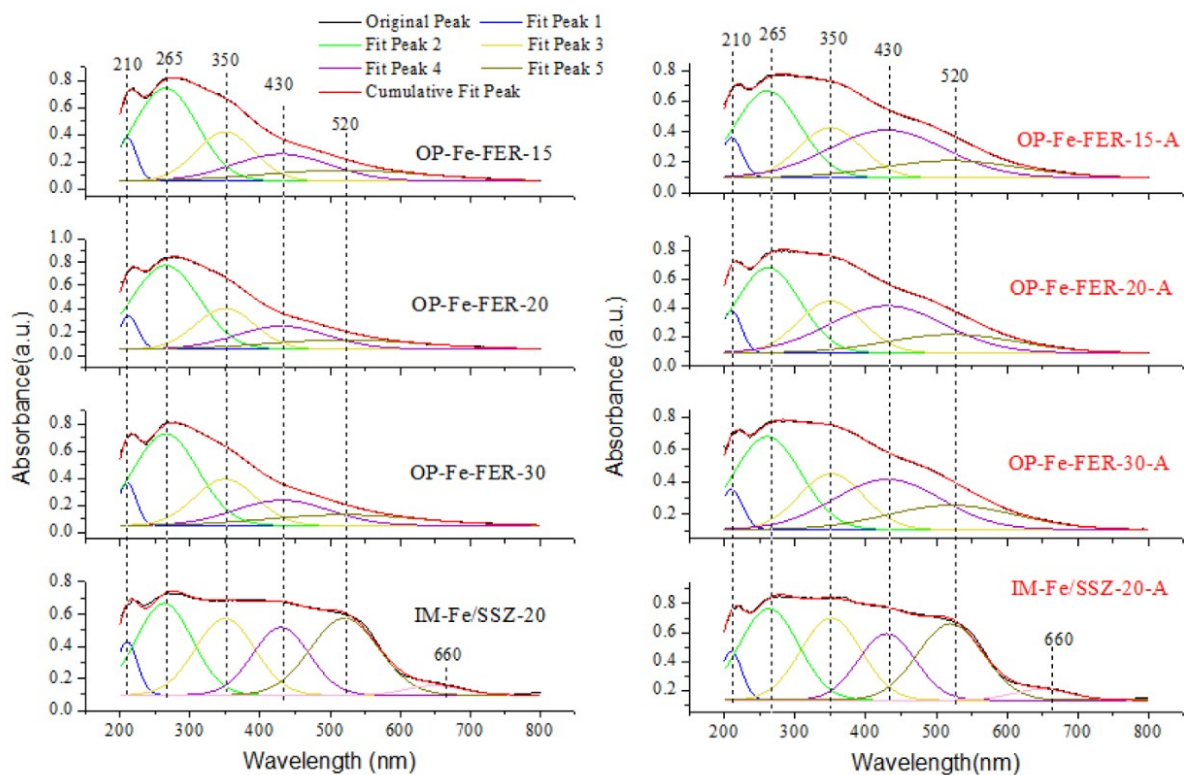

Figure S2 UV-vis fitting results of fresh and aged OP-Fe-FER-x and IM-Fe/SSZ-20 zeolites.

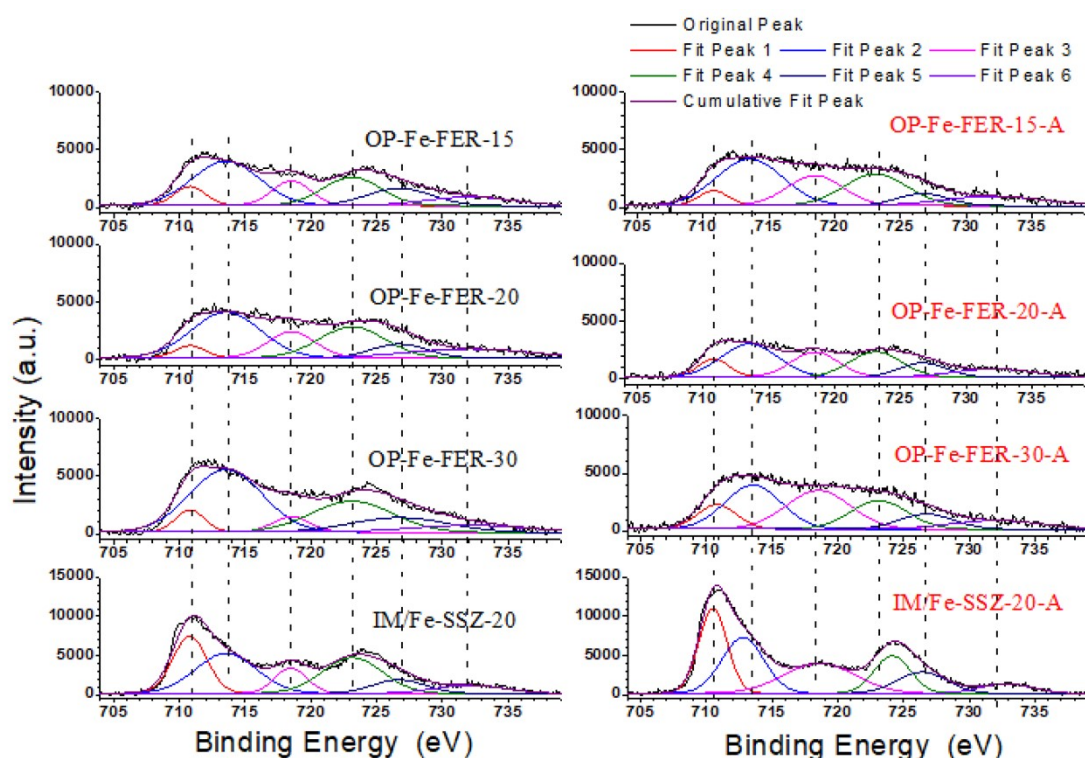

Figure S3. XPS spectra fitting results of fresh and aged OP-Fe-FER-x zeolites (the fit peaks 1-6 are centered at about 710.8 eV, 713.6 eV, 718.5 eV, 723.1 eV, 726.7 eV and 732.1 eV, respectively).

According to literatures<sup>1-4</sup>, Fe<sup>3+</sup> 2p<sub>1/2</sub> and 2p<sub>3/2</sub> signals are located at about 724 eV and 711 eV with satellite peaks at ca. 733 eV and 719 eV, while the Fe<sup>2+</sup> 2p<sub>1/2</sub> and 2p<sub>3/2</sub> signals are located at ca. 723 eV and 710 eV with satellite peaks at ca. 729 eV and 715 eV, respectively. Therefore, the fit peak 1 and 4 are attributed to Fe<sup>2+</sup> species, while the fit peak 2, 3, 5 and 6 are attributed to Fe<sup>3+</sup> species and the corresponding satellite peaks.

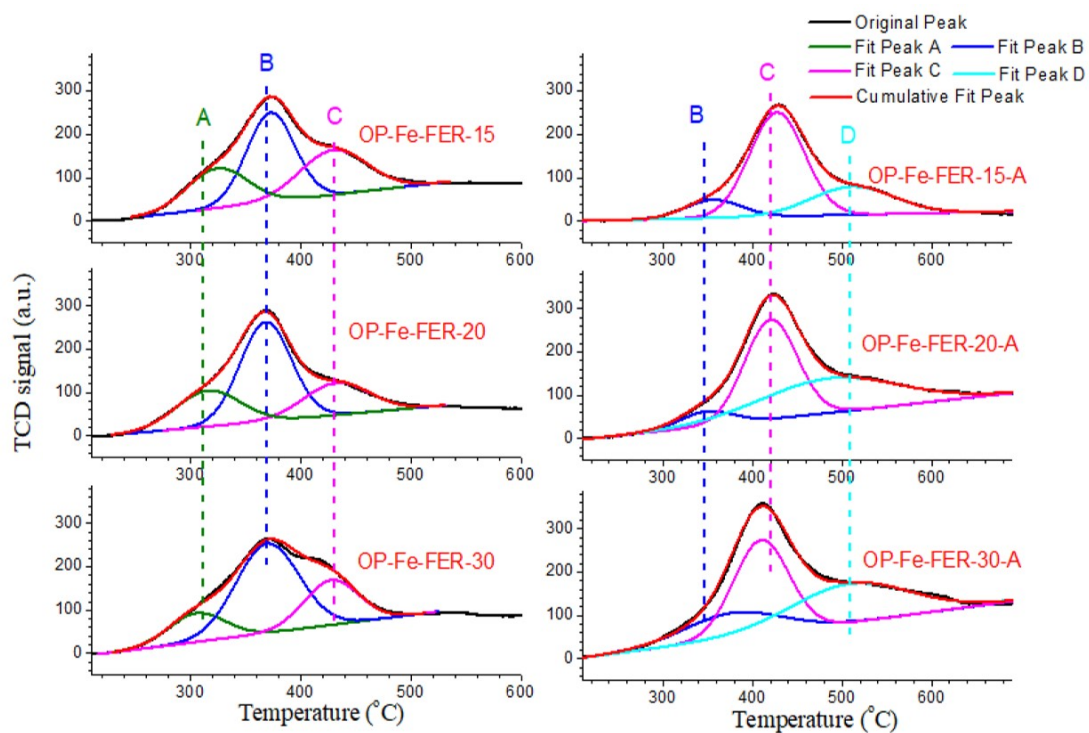

Figure S4. H<sub>2</sub>-TPR fitting results of fresh and aged OP-Fe-FER-x zeolites.

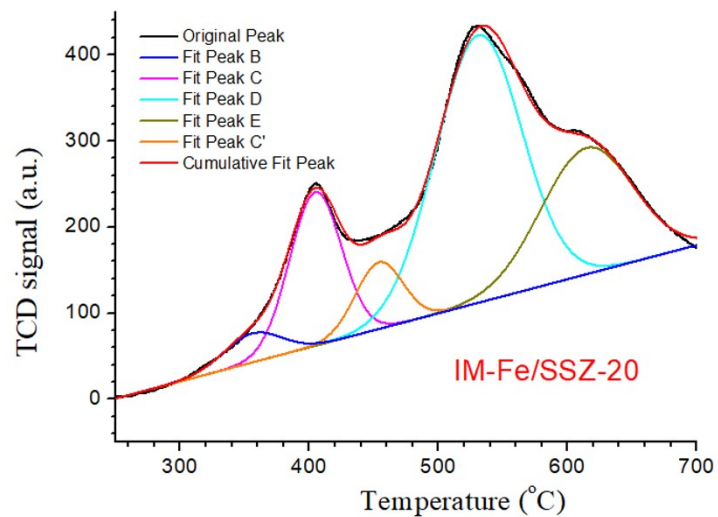

Figure S5. H<sub>2</sub>-TPR fitting results of fresh IM-Fe/SSZ-20 zeolite.

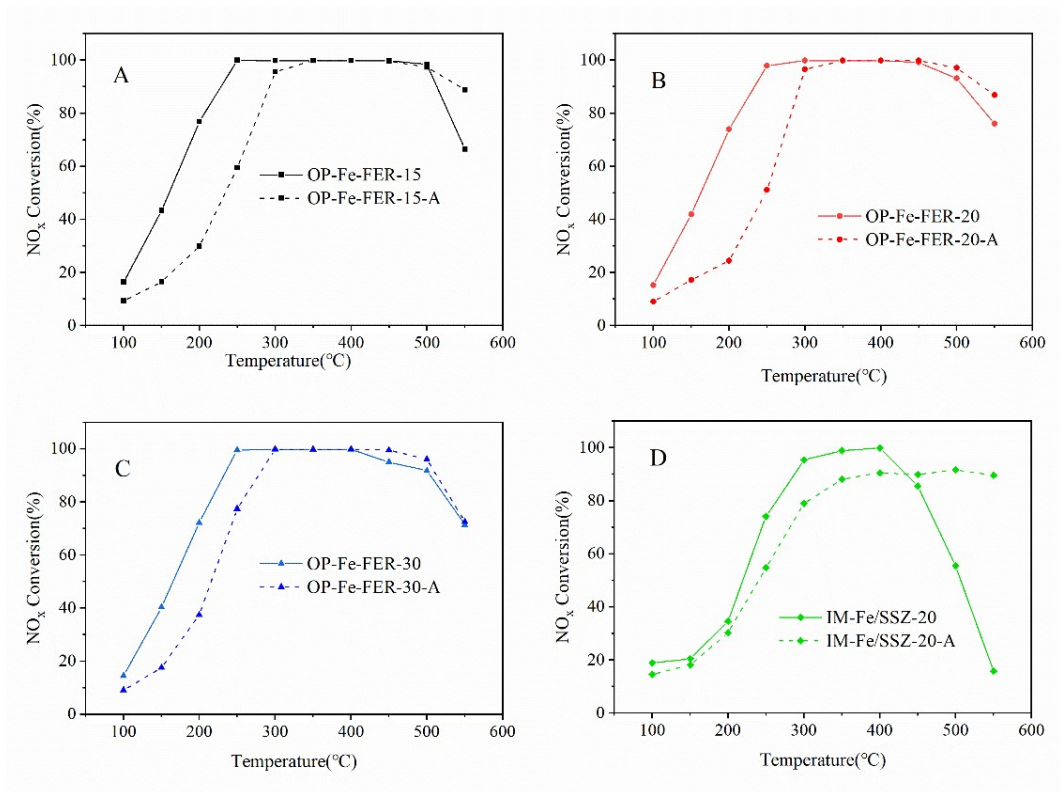

Figure S6 NO<sub>x</sub> conversion in NH<sub>3</sub>-SCR as a function of temperature over fresh and aged OP-Fe-FER-x and IM-Fe/SSZ-20 zeolites. Reaction conditions: 500 ppm NO, 600 ppm NH<sub>3</sub>, 5.5% O<sub>2</sub> and balanced N<sub>2</sub>, GHSV = 36000 h<sup>-1</sup>.



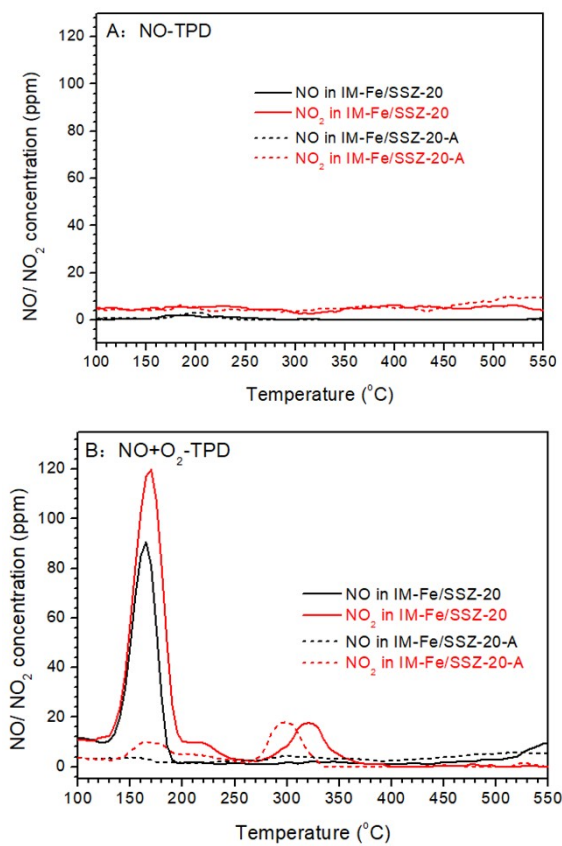

Figure S7 (A) NO-TPD and (B) NO+O<sub>2</sub>-TPD results over fresh and aged IM-Fe/SSZ-20 zeolites.

**Table S1 Representative Fe-based zeolite catalysts for NH<sub>3</sub>-SCR**

| Catalysts     | Framework topology | Preparation method <sup>a</sup> | Fe content (wt. %) | NH <sub>3</sub> -SCR reaction condition                                                                                                                                                   | Temperature window (°C) | NO <sub>x</sub> conversion | Reference |
|---------------|--------------------|---------------------------------|--------------------|-------------------------------------------------------------------------------------------------------------------------------------------------------------------------------------------|-------------------------|----------------------------|-----------|
| OP-Fe-FER-30  | FER                | OP                              | 5.4                | 500 ppm NO, 600 ppm NH <sub>3</sub> , 5.5 vol.% O <sub>2</sub> , balanced N <sub>2</sub> , GHSV = 3.6×10 <sup>4</sup> h <sup>-1</sup>                                                     | 210 – 530               | >80%                       | This work |
| IM-Fe/SSZ-20  | CHA                | IWI                             | 5.0                | 500 ppm NO, 600 ppm NH <sub>3</sub> , 5.5 vol.% O <sub>2</sub> , balanced N <sub>2</sub> , GHSV = 3.6×10 <sup>4</sup> h <sup>-1</sup>                                                     | 264 – 460               | >80%                       | This work |
| Fe/ZSM-5      | MFI                | IE                              | 1.9                | 1000 ppm NO, 1000 ppm NH <sub>3</sub> , 5 vol.% O <sub>2</sub> , 6 vol.% H <sub>2</sub> O and balanced He, GHSV = 1.9×10 <sup>5</sup> h <sup>-1</sup>                                     | 300 – 550               | >80%                       | 5         |
| Fe/Beta       | BEA                | CVD                             | 4.7                | 1000 ppm NO, 1200 ppm NH <sub>3</sub> , 8 vol.% O <sub>2</sub> , 8 vol.% H <sub>2</sub> O, 10 vol.%CO <sub>2</sub> , balanced N <sub>2</sub> , GHSV = 2.1×10 <sup>5</sup> h <sup>-1</sup> | 300 – 500               | >90%                       | 6         |
| Fe/Mordenite  | MOR                | IE                              | 2.3                | 500 ppm NO, 500 ppm NH <sub>3</sub> , 5 vol.% O <sub>2</sub> , balanced N <sub>2</sub> , GHSV = 1.6×10 <sup>4</sup> h <sup>-1</sup>                                                       | 350 – 500               | 100%                       | 7         |
| Fe/SSZ-13     | CHA                | IE                              | 1.37               | 350 ppm NO, 350 ppm NH <sub>3</sub> , 14 vol.% O <sub>2</sub> , 2.5 vol.% H <sub>2</sub> O, balanced N <sub>2</sub> , GHSV = 2×10 <sup>5</sup> h <sup>-1</sup>                            | 320 – 550               | >80%                       | 8         |
| Fe-SAPO-34    | CHA                | OP                              | 1.0                | 350 ppm NO, 350 ppm NH <sub>3</sub> , 14 vol.% O <sub>2</sub> , 5 vol.%CO <sub>2</sub> , balanced Ar, GHSV = 3.0×10 <sup>4</sup> h <sup>-1</sup>                                          | 300 – 600               | >80%                       | 9         |
| Fe/Ferrierite | FER                | CVD                             | 4.7                | 1000 ppm NO, 1200 ppm NH <sub>3</sub> , 8 vol.% O <sub>2</sub> , 8 vol.% H <sub>2</sub> O, 10 vol.%CO <sub>2</sub> , balanced N <sub>2</sub> , GHSV = 2.1×10 <sup>5</sup> h <sup>-1</sup> | 250 – 500               | >90%                       | 6         |
| Fe-SSZ-39     | AEI                | OP                              | 1.01               | 50 ppm NO, 60 ppm NH <sub>3</sub> , 10 vol.% O <sub>2</sub> , 10 vol.% H <sub>2</sub> O, balanced N <sub>2</sub> , GHSV = 4.5×10 <sup>5</sup> h <sup>-1</sup>                             | 300 – 550               | >90%                       | 10        |
| Fe-ERI        | ERI                | OP                              | 1.03               | 500 ppm NO, 600 ppm NH <sub>3</sub> , 10 vol.% O <sub>2</sub> , 10 vol.% H <sub>2</sub> O, balanced N <sub>2</sub> , GHSV = 1×10 <sup>5</sup> h <sup>-1</sup>                             | 450 – 550               | >60%                       | 11        |
| Fe-SSZ-16     | AFX                | OP                              | 0.95               | 500 ppm NO, 500 ppm NH <sub>3</sub> , 5 vol.% O <sub>2</sub> , 10 vol.% H <sub>2</sub> O, balanced N <sub>2</sub> , GHSV = 1×10 <sup>5</sup> h <sup>-1</sup>                              | 400 – 550               | >80%                       | 11        |
| Fe-MCM-22     | MWW                | OP                              | 4.8                | 500 ppm NO, 500 ppm NH <sub>3</sub> , 5 vol.% O <sub>2</sub> and balanced N <sub>2</sub> , GHSV = 6×10 <sup>4</sup> h <sup>-1</sup>                                                       | 190 – 490               | >80%                       | 12        |
| Fe/LTA        | LTA                | IE                              | 1.8                | 500 ppm NO, 500 ppm NH <sub>3</sub> , 5 vol.% O <sub>2</sub> , 10 vol.% H <sub>2</sub> O and balanced N <sub>2</sub> , GHSV = 1×10 <sup>5</sup> h <sup>-1</sup>                           | 370 – 580               | >90%                       | 13        |
| Fe/UZM-35     | MSE                | IE                              | 1.9                | 500 ppm NO, 500 ppm NH <sub>3</sub> , 5 vol.% O <sub>2</sub> , 10 vol.% H <sub>2</sub> O and balanced N <sub>2</sub> , GHSV = 1×10 <sup>5</sup> h <sup>-1</sup>                           | 250 – 570               | >90%                       | 14        |

<sup>a</sup> OP, IWI, IE and CVD represent one-pot synthesis method, incipient wetness impregnation method, ion-exchange method and chemical vapor deposition method, respectively.



---

## References:

1. F. Mercier, N. Thomat and C. J. A. S. S. Beaucaire], *Appl. Surf. Sci.*, 2000, **165**, 2880302.
2. P. Boron, L. Chmielarz, J. Gurgul, K. Łatka, B. Gil, B. Marszałek and S. Dzwigaj, *Microporous Mesoporous Mater.*, 2015, **203**, 73-85.
3. T. Yamashita and P. Hayes, *Appl. Surf. Sci.*, 2008, **254**, 2441-2449.
4. D. D. Hawn and B. M. DeKoven, *Surf. Interface Anal.*, 1987, **10**, 63-74.
5. J. Li, R. Zhu, Y. Cheng, C. K. Lambert and R. T. Yang, *Environ. Sci. Technol.*, 2010, **44**, 1799-1805.
6. M. Iwasaki, K. Yamazaki and H. Shinjoh, *Appl. Catal. B: Environ.*, 2011, **102**, 302-309.
7. L. Ma, J. Li, Y. Cheng, C. K. Lambert and L. Fu, *Environ. Sci. Technol.*, 2012, **46**, 1747-1754.
8. F. Gao, M. Kollár, R. K. Kukkadapu, N. M. Washton, Y. Wang, J. Szanyi and C. H. Peden, *Appl. Catal. B: Environ.*, 2015, **164**, 407-419.
9. S. Andonova, S. Tamm, C. Montreuil, C. Lambert and L. Olsson, *Appl. Catal. B: Environ.*, 2016, **180**, 775-787.
10. N. Martín, P. N. R. Vennestrom, J. R. Thøgersen, M. Moliner and A. Corma, *ChemCatChem*, 2017, **9**, 1754-1757.
11. N. Martín, C. Paris, P. N. R. Vennestrøm, J. R. Thøgersen, M. Moliner and A. Corma, *Appl. Catal. B: Environ.*, 2017, **217**, 125-136.
12. J. Chen, G. Peng, W. Zheng, W. Zhang, L. Guo and X. Wu, *Catal. Sci. Technol.*, 2020, **10**, 6583-6598.
13. T. Ryu, Y. Kang, I.-S. Nam and S. B. Hong, *React. Chem. Eng.*, 2019, **4**, 1050-1058.
14. T. Ryu and S. B. Hong, *Appl. Catal. B: Environ.*, 2020, **266**, 118622-118630.
